# Supplementary material for: The Role and Position of Palliative Care Nurses within the Dutch Healthcare System: A Mixed-Methods Study.
Source: Research Square preprint supplement (doi:10.21203/rs.3.rs-6759275/v1), 2025-06-23
Supplement: Supplementary file 1 [file 9788f8c0d1f52caac4301655.docx]

**Appendix 2: Topic list for focus group**

**Conversation manual focus groups palliative care nurse**

**Introduction (10 minutes)**

- Informed consent form (signed?)
- First of all, thank you for being willing to participate in this focus group. It's great that you're here today. Today, we will discuss the role of the palliative care nurse within a healthcare organization. We would like to hear from you about your experiences in your role, the work you do, what you are satisfied with, and what areas could be strengthened within the organization.
- Introductions: moderators and notetaker
- You participate in this focus group because you indicated in the questionnaire that you wish to participate. We want to discuss your experience as a palliative care nurse.
- Therefore, you must conclude from your experience that there are no wrong answers.
- We will soon start with a round of introductions. Then, I would like to start asking the questions.
- The conversation lasts a maximum of 2 hours, and we take a 5 - 10 minute break.
- My role is to ensure everyone is equally involved in the conversation. I also intervene occasionally when we move on to a new subject. I want all themes to be discussed adequately within 2 hours.
- Before we begin the conversation, I have a question: May I record the conversation (audio only)? The purpose of the recording is to allow us to review the answers given, ensuring that we do not miss any vital information in our research. The results are used anonymously and cannot be traced back to you. Is the sound recording satisfactory to you?
- Are there any questions?

**Opening question (10 minutes)**

When you think of your role as a palliative care nurse, what is the first thing that comes to mind?

**Key questions part 1 (30 minutes)**

I want to zoom in on three different topics in this conversation, namely:

- Work activities and consultation (presentation)
- Nursing leadership (presentation)
- Assurance
- **Work activities and Consultation**
  - 1. Does the image you see within the domains (physical, psychological, social, and spiritual) correspond to your daily work? (slides 6 and 7)
    2. What does the picture from proactive care planning and joint decision-making look like in daily practice? What does the 'driving' role look like around ACP and SDM? ( 8 and 9)
    3. Who do you work with? What does interprofessional and transmural collaboration look like (13, 14, and 15)? What does the relationship with the social domain look like?
    4. Participation PaTz/PAT and regional consultation team: Have you been asked for this, or do you apply for this? (13, 14, and 15)
    5. We also observe (as noted in previous studies) that activities related to the primary care process are more frequently undertaken than participation in research, guidelines, policy committees, etc. How is that for you? And do you see a possible explanation?
    6. What does your contribution to social awareness look like?
    7. Variation per work setting?
    8. The data shows that you are consulted less often than you do work yourself. We also see differences around naming. Many individuals identify themselves as palliative care nurses, while others refer to themselves as consultants. My question is: Are you a palliative care nurse with consultant skills or a consultant with nursing skills?
    9. How is cooperation, expertise promotion, and involvement with 'generalist' care providers facilitated?
    10. For which issues have you not been approached?
    11. Do you feel appreciated by colleagues or the organization about your role?
    12. How satisfied are you with the work you perform?
    13. If you can dream, what does your ideal interpretation of your job look like?
    14. What would you like to see changed?
    15. What should be preserved?
    16. Summary

**Break (10 minutes)**

**Key questions part 2 (30 minutes)**

- **Nursing Leadership (15 minutes)**
  1. What do you mean by nursing leadership in palliative care?
  2. From the data from the questionnaire, we see that 'connector, booster, cooperation partner' are roles that help to show leadership
  3. We hardly saw EBP again; does that image correspond to your role?
  4. Which leadership qualities help make one visible?
  5. What leadership qualities would you like to strengthen?
  6. Do you have any additional information besides what has already been mentioned?
  7. Summarize
- **Assurance (15 minutes)**
  1. How is your position secured in the (care) organization?
  2. Is the professional profile of a Palliative Care Nurse from V&VN the starting point for your job description, or is a different description used? (Formally recorded at HR?)
  3. What happens when you leave the care organization?

**Closing questions (10 minutes)**

- Summary: This is what I heard. Am I summarizing it correctly, or have I missed any items?
- What do you think is the most important thing I should take away from this conversation?

**Conversation manual for focus group managers**

**Introduction (10 minutes)**

- Informed consent form (signed?)
- First of all, thank you for being willing to participate in this focus group. It's great that you're here today. Today, we will discuss the position of the palliative care nurse in the care organization. We would like to hear from you about your experiences in your role, the work you do, what you are satisfied with, and what areas can be strengthened within the organization.
- Introductions: moderators and notetaker
- You are participating in this focus group because you responded to our call or were approached via the network coordinators' PZ. We want to talk to you about your experience as a manager regarding the deployment of the HR nurse within your organization.
- Therefore, you must conclude from your experience that there are no wrong answers.
- We will soon start with a round of introductions. Then, I would like to start asking the questions.
- The conversation lasts a maximum of 2 hours; we take a 5- to 10-minute break.
- Before we begin the conversation, I have a question: may I record the conversation (audio only)? The purpose of the recording is to allow us to review the answers given, ensuring that we do not miss any important information in our research. The results are used anonymously and cannot be traced back to you. Is the sound recording satisfactory to you?
- Are there any questions?

**Key questions part 1 (30 minutes)**

I want to zoom in on three different topics in this conversation, namely:

- Work activities and consultation (presentation)
- Nursing leadership (presentation)
- Assurance
- Work activities and consultation
  - 1. What work activities does a palliative care nurse perform in your organization?
    2. Where is the focus? In primary care (at the bedside) or in the ward or department, transcending?
    3. What work activities do you consider distinctive compared to a generalist?
    4. Which care processes are a palliative care nurse responsible for in your organization?
    5. What would you like to see changed in the use of palliative care nurses?
    6. What should be retained around the deployment of the palliative care nurse?
    7. How satisfied are you with the efforts of the palliative care nurse?
    8. How would you rate the use of palliative care nurses?
    9. We also observe (as in previous studies) that activities related to the primary care process are more frequently carried out than participation in research, guidelines, policy committees, etc. How is that for you? And do you see a possible explanation?
    10. Who consults the palliative care nurse?
    11. Do you have insight (HiX or otherwise) into how they monitor activities within the organization? How do they earn themselves?
    12. *Role PaTz or interprofessional collaboration?*

**Break (10 minutes)**

**Key questions part 2 (30 minutes)**

- Assurance (15 minutes)
  1. 1. How is the function of a palliative care nurse established within the care organization?
  2. Is the professional profile of a Palliative Care Nurse at V&VN the starting point for your job description, or is a different description used? (Formally recorded at HR?)
  3. What happens if they leave the care organization?
- Nursing Leadership (15 minutes)
  1. As a nursing leadership person, what do you see reflected in the organization?
  2. From the questionnaire data, we see that 'connector, booster, and cooperation partner' are roles that help demonstrate leadership. Is this recognizable?
  3. *We hardly saw EBP again; does that image match your image?*
  4. Which leadership qualities help to be visible?
  5. What leadership qualities could strengthen the palliative care nurse?
  6. Do you have any additional information besides what has already been mentioned?

Closing questions (10 minutes)

- Summary: This is what I heard. Am I summarizing it correctly, or have I missed any items?
- What do you think is the most important thing I should take away from this conversation?

Completion:

Thank you for your participation
