# Supplementary material for: The Role and Position of Palliative Care Nurses within the Dutch Healthcare System: A Mixed-Methods Study.
Source: Research Square preprint supplement (doi:10.21203/rs.3.rs-6759275/v1), 2025-06-23
Supplement: Supplementary file 2 [file b4d470266d6aa4a20b5871cd.docx]

Appendix 1 Questionnaire

Positioning palliative care nurse

**Introduction**

**Research into the positioning of palliative care nurses**
Are you trained as a palliative care nurse? Have you completed palliative care nurse training at Erasmus MC, Ede University of Applied Sciences, Utrecht University of Applied Sciences, or Saxion University of Applied Sciences? Your opinion counts!

In the Netherlands, palliative care is general, meaning that every healthcare professional is required to be able to provide palliative care. In many countries, palliative care is recognized as a specialist field and is a formal specialty within the nursing and medical professions. Because we do not consider palliative care a formal specialism in the Netherlands, there are still many uncertainties about the role of the palliative care nurse within various care organizations. In this study, we examine the role of palliative care nurses in the Netherlands within their respective healthcare organizations.

The research consists of two rounds. In this written round, we begin by inquiring about your experience as a palliative care nurse. In the second round, we organized focus groups for several palliative care nurses and their managers.

At the end of the questionnaire, we will ask if you would like to participate in a focus group. You can enter your email address at the end of the list. The focus groups are scheduled for July and September 2024. We handle your data and privacy with care.

Answering the questions will take approximately 15 minutes of your time.

Thank you in advance for your participation! V&VN Palliative care department, Ingrid van Zuilekom, Suzanne Metselaar, Berdine Koekoek, Fleur Godrie, Harmieke van Os-Medendorp, Bregje Onwuteaka-Philipsen

Q0 To protect your privacy, your data will not be stored unless you enter your email address to be invited to the focus groups. We will then use your email address to send the invitation. All other answers to the questions in the questionnaire are kept anonymous. We guarantee that these answers cannot be traced back to you. Do you permit your answers to the questions in the questionnaire to be used for research purposes?

- I consent to use my answers for the above research purposes.

Q0 You have completed a palliative care course of at least 21 teaching days.

- Yes, at Erasmus MC
- Yes, at the Christian University of Applied Sciences Ede
- Yes, at Hogeschool Utrecht
- Yes, at Saxion University of Applied Sciences
- No, I have not followed any of the above courses

Go to: End of survey If You have completed a palliative care course of at least 21 teaching days. = No, I have not followed any of the above courses

Q0. Do you work in direct patient care?

- Yes
- No

Go to: End of survey If do you work in direct patient care? = No

Q1 What is your age?

Q2 What is your gender?

- Woman
- Male
- Non-binair
- I'd rather not say

Q3 What province do you live in?

- Friesland
- Groningen
- Drenthe
- Overijssel
- Gelderland
- Flevoland
- North Holland
- South Holland
- Utrecht
- North Brabant
- Limburg
- Zeeland

Q4 You are:

Vocational level nurse (NLQF level 4)

- In-Service trained, A, B or Z nurse
- Bachelor nurse (NLQF level 6 or before 2020 NLQF level 5)

Q5 How would you describe yourself based on the palliative care course you followed?

- Palliative Care Nurse
- Palliative Care Consultant
- Palliative care specialist
- Other, namely:

Q6: In which setting do you mainly work?

- Hospital
- Nursing Home
- Home care
- Hospice
- General practice
- Health center
- Mental Health Care
- Organization for persons with physical or mental disabilities
- Other, namely:

Q7 How many years of professional work experience in healthcare do you have?

- 0-5 years
- 6-10 years
- 11-20 years
- More than 20 years

Q8 How many years of that do you provide palliative care (by palliative care we mean care for people with a life-threatening condition or vulnerability, where the care is mainly focused on quality of life).

- 0-5 years
- 6-10 years
- 11-20 years
- More than 20 years

Q9How many patients with palliative care needs have you cared for in the past 12 months?

- 1 - 10 patients
- 11 - 20 patients
- 21 - 40 patients
- 41 - 60 patients
- More than 60 patients

Q10 Do you hold a dual role as a palliative care nurse and another position within your healthcare organization?

- Yes, namely in combination with oncology nurse
- Yes, namely in combination with a district nurse
- Yes, namely in combination with geriatric nurse
- Yes, namely in combination with quality nurse
- Yes, namely: No

Q11. How many hours do you work per week?

Q12: How many hours per week do you actively spend on palliative care as a palliative care nurse, including both primary care tasks and overarching responsibilities, such as promoting expertise?

Q13 Do you work as a palliative care nurse for the entire healthcare organization or just for your team?

- Only for my team
- For the entire healthcare organization
- Other, namely:

Q14 Are there other palliative care nurses working in your organization besides you?

- Yes
- No
- I don't know

Q15 Is there a palliative advice team or PaTz group in your organization?

- Yes, there is a palliative advice team in my organization
- Yes, there is a palliative consultation team in my region
- Yes, we participate in a PaTz group
- No
- I don't know

Q16 Does your organization have a palliative care nurse on the palliative advice team, regional consultation team, or PaTz group?

- Yes, in a palliative advice team of the organization
- Yes, in a palliative consultation team in my region
- Yes, in a PaTz group
- No
- I don't know

Q17 Is the role of a palliative care nurse described in the function/profession of your organization?

- Yes
- No
- I don't know

Q18 Do you consider yourself in your role as a palliative care nurse, as a case manager, or as a central care provider?

- Case manager
- Central health care provider
- Neither
- I don't know

Q19. Are you familiar with the profile of the palliative care nurse (V&VN, 2022)?

- Yes
- No

Q20: What does your work as a palliative care nurse entail? Indicate how often you perform each activity below yourself and how often you are consulted about them.

|  | How often do you perform this work? | | | | | How often are you consulted by your colleagues about this topic? | | | | |
| --- | --- | --- | --- | --- | --- | --- | --- | --- | --- | --- |
|  | Never (1) | Rarely (2) | Sometimes (3) | Often (4) | Very often (5) | Never (1) | Rarely (2) | Sometimes (3) | Often (4) | Very often (5) |
| 1.I provide palliative care to care recipients in complex physical situations. |  |  |  |  |  |  |  |  |  |  |
| 2. I provide palliative care to care recipients in complex psychological situations. |  |  |  |  |  |  |  |  |  |  |
| 3. I provide palliative care to care recipients in complex social situations. |  |  |  |  |  |  |  |  |  |  |
| 4. I provide palliative care to care recipients in complex situations in the spiritual field. |  |  |  |  |  |  |  |  |  |  |
| 5. I have a driving role in developing a proactive care plan (ACP). |  |  |  |  |  |  |  |  |  |  |
| 6. I inform the patient and their loved ones respectfully and empathetically and thus promote their participation in decisions about their care plan. |  |  |  |  |  |  |  |  |  |  |
| 7. I make palliative care a topic of discussion with patients and loved ones. |  |  |  |  |  |  |  |  |  |  |
| 8. I have a driving role in the process of joint decision-making. |  |  |  |  |  |  |  |  |  |  |
| 9. I am committed to monitoring and improving the conditions under which palliative care is provided. |  |  |  |  |  |  |  |  |  |  |
| 10. I use applicable guidelines and protocols in palliative care. |  |  |  |  |  |  |  |  |  |  |
| 11. I reflect on moral issues surrounding care and treatment for patients with a high vulnerability or with a limited life expectancy |  |  |  |  |  |  |  |  |  |  |
| 12. I identify the specific wishes of the patient and his loved ones regarding dying. |  |  |  |  |  |  |  |  |  |  |
| 13. I identify (complex) grief in patients. |  |  |  |  |  |  |  |  |  |  |
| 14. I offer adequate care for (complex) grief. |  |  |  |  |  |  |  |  |  |  |
| 15. I participate in a palliative advice team and/or PaTz group within my care organization. |  |  |  |  |  |  |  |  |  |  |
| 16. I participate in a palliative consultation team with a regional function. |  |  |  |  |  |  |  |  |  |  |
| 17. I encourage interprofessional collaboration. |  |  |  |  |  |  |  |  |  |  |
| 18. I encourage transmural collaboration. |  |  |  |  |  |  |  |  |  |  |
| 19. I participate in scientific research in the field of palliative care. |  |  |  |  |  |  |  |  |  |  |
| 20. I keep my expertise in palliative care up to date. |  |  |  |  |  |  |  |  |  |  |
| 21. I attend accredited intervision meetings with fellow palliative care specialists. |  |  |  |  |  |  |  |  |  |  |
| 22. I promote the expertise of (generalist) care providers about palliative care. |  |  |  |  |  |  |  |  |  |  |
| 23. I participate in (policy) committees and (guideline) working groups to improve the quality of palliative care. |  |  |  |  |  |  |  |  |  |  |
| 24. I inspire care providers in other healthcare fields about palliative care. |  |  |  |  |  |  |  |  |  |  |
| 25. I contribute to social awareness about palliative care. |  |  |  |  |  |  |  |  |  |  |
| 26. I also carry out other activities, namely: |  |  |  |  |  |  |  |  |  |  |

Q21: How satisfied are you with your deployment within the nursing domain in your organization?

- Very dissatisfied
- Dissatisfied
- Not satisfied, not dissatisfied
- Satisfied
- Very satisfied

Q22 How satisfied are you with how fellow care providers know how to find you with questions about palliative care?

- Very dissatisfied
- Dissatisfied
- Not satisfied, not dissatisfied
- Satisfied
- Very satisfied

Q23 As a palliative care nurse, how do you show nursing leadership?

Q24: Have your nursing leadership qualities influenced your role as a palliative care nurse within the organization?

- Yes, namely by
- No, namely by
- I don't know

**End of questionnaire**

Thank you for completing the questionnaire and for your contribution to this study. Would you also like to participate in a focus group as part of the second survey round? Please enter your email address below. The focus groups are scheduled for July and September 2024. You will then receive further notice from us.
